# Supplementary material
Source: PubMed Central journal article supplement (PMC7113723)

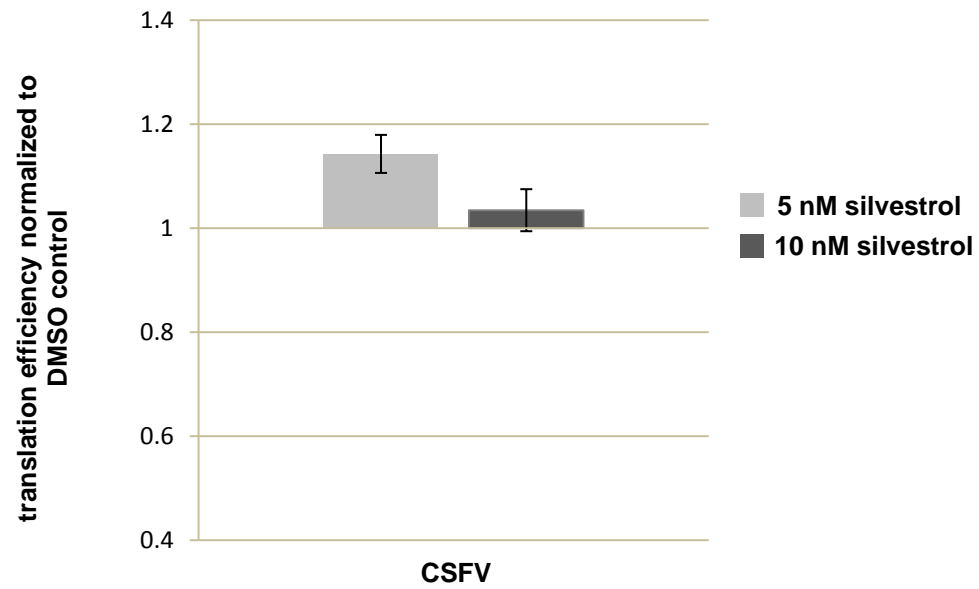

Figure S1

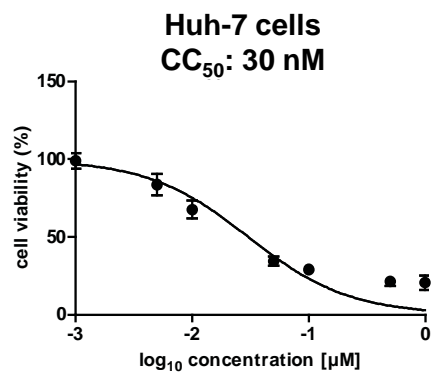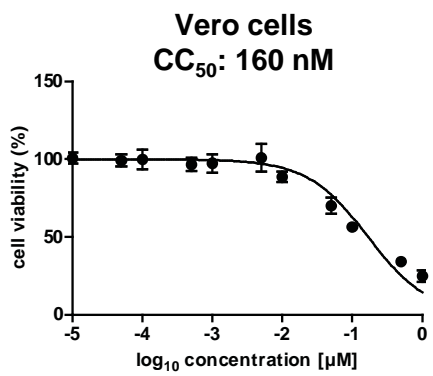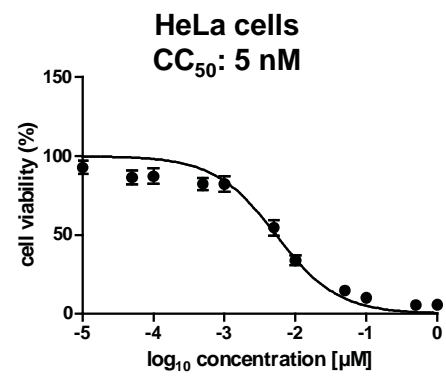

**Figure S2**

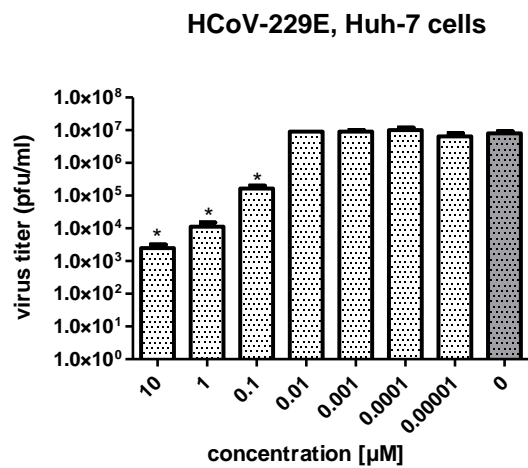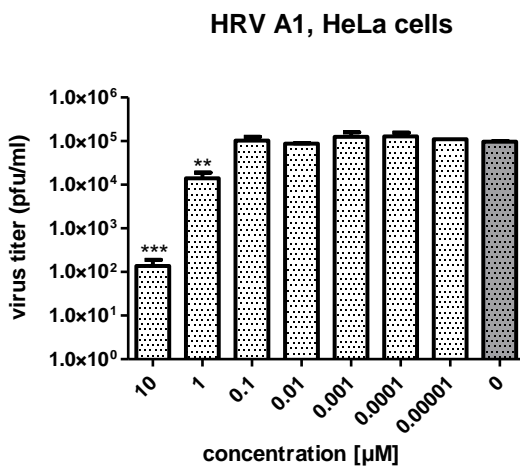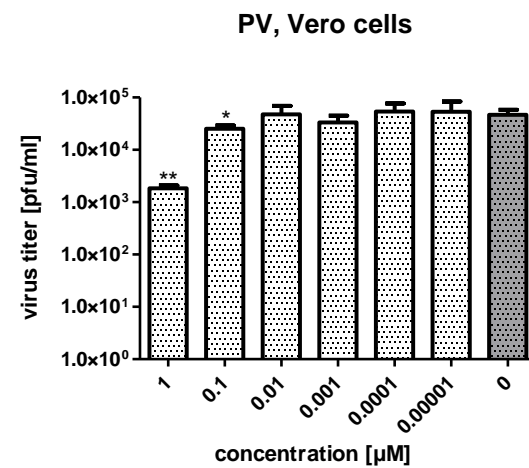

Figure S3

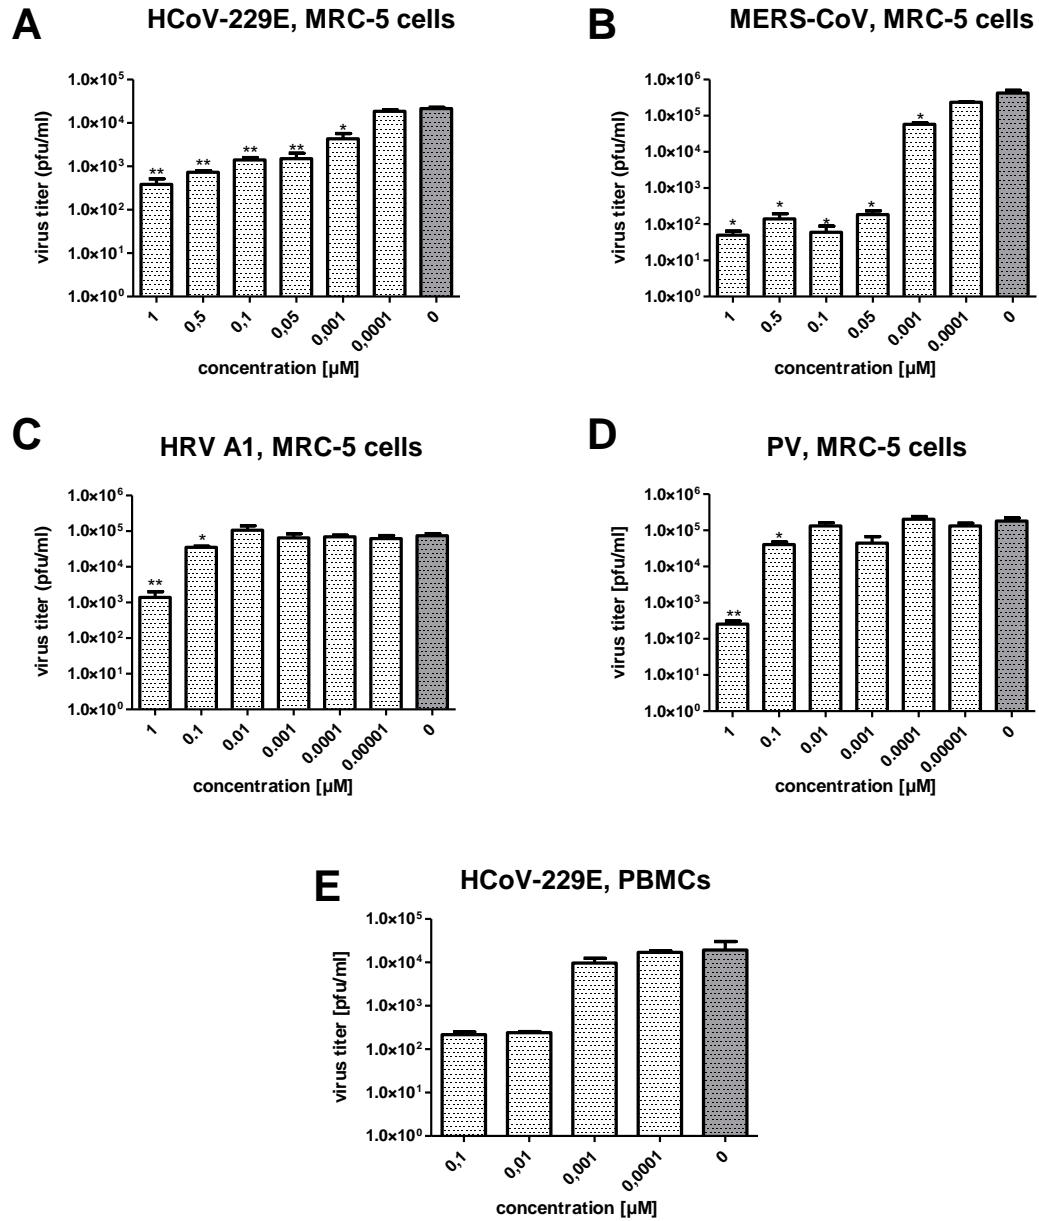

Figure S4

Supplement: mmc1.pdf [file mmc1.pdf]
